# Supplementary material for: Neuronal CaMKK2 promotes immunosuppression and checkpoint blockade resistance in glioblastoma
Source: PubMed Central journal article supplement (PMC9617949; doi:10.1038/s41467-022-34175-y), 2022-10-29
Supplement: 41467_2022_34175_MOESM1_ESM.pdf [file 41467_2022_34175_MOESM1_ESM.pdf]

Supplementary Figure 1

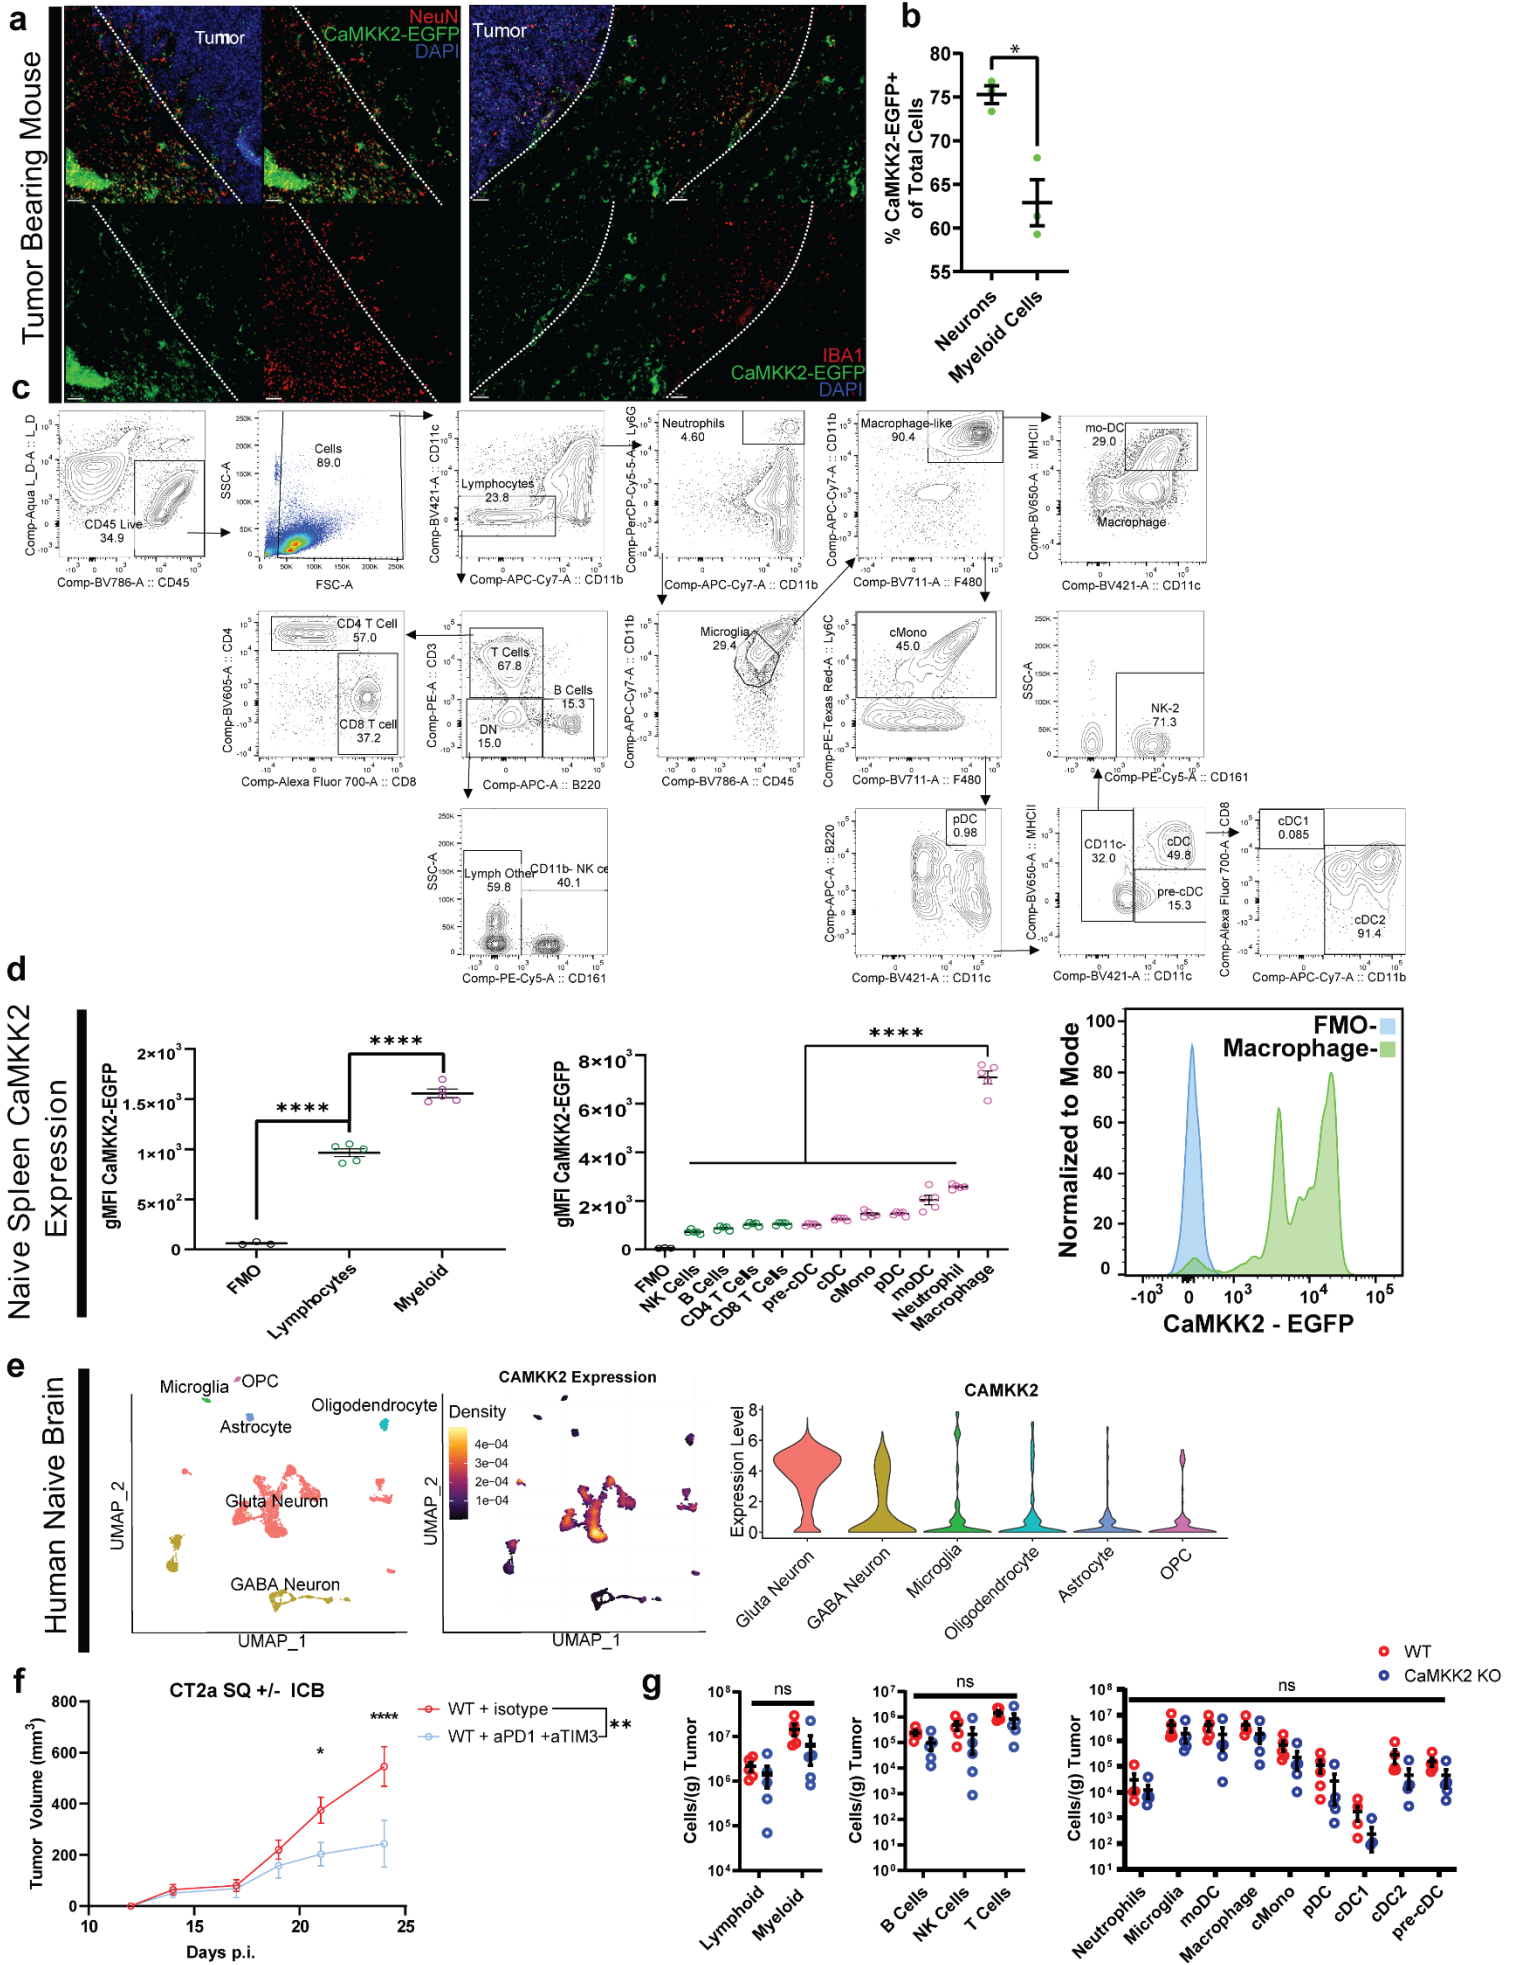

Supplementary Figure 1. **CaMKK2 is highly expressed in neurons and myeloid cells in humans and mice.** **a,b** Confocal images of D14 brain tumor sections of CaMKK2-EGFP reporter mice. NeuN and IBA1 were used to identify neurons and myeloid cells respectively. Imaris was used to determine the colocalization of either Iba1 or NeuN and CaMKK2-EGFP signal. Y-axis denotes % of total cells of that type that are EGFP+. N = 3 mice per staining panel, two-tailed t-test. \* =  $p = .0119$ . Scale bar represents 70 $\mu$ m. **c** Flow cytometry gating strategy that was utilized in Fig.1a and Supplementary Fig.1d,g **d** Spleens were harvested from naïve WT (FMO) or transgenic CaMKK2-EGFP reporter mice and stained with a multi-color flow panel to resolve major immune populations. N = 3 FMO, and n = 5 per other groups, ANOVA  $p < .05$  with post-hoc unadjusted Fisher LSD two-tailed t-test. \*\*\*\* =  $p < .0001$ . **e** UMAP plot of Naïve Human Brain cells, and density and violin plots showing CaMKK2 expression within those cell types. Data pulled from Allen Institute for Brain Science (<https://portal.brain-map.org/atlasses-and-data/rnaseq/human-m1-10x>) **f** 250k CT2a was implanted in the flank of WT mice and tumor growth was monitored. Either 400ug isotype or a combination therapy of 200ug aPD1 and 200ug aTIM3 was administered on D3 p.i and every 3 days through D15 for a total of 5 treatments. n = 8 per group, 2-way ANOVA  $p < .05$  with post-hoc unadjusted Fisher LSD two-tailed t-test. \*\* =  $p = .0097$ , \*\*\*\* = adj.  $p < .0001$ . **g** Tumor-bearing hemispheres were harvested from WT or CaMKK2 KO mice on D14 and stained with a multi-color flow panel to resolve major immune populations. n = 5, Two-way RM ANOVA  $p < .05$  with post-hoc two-tailed unadjusted Fisher LSD t-test. **b,d,f,g** Data are presented as mean  $\pm$  S.E.M. Source data are provided as a Source Data file.

Supplementary Figure 2

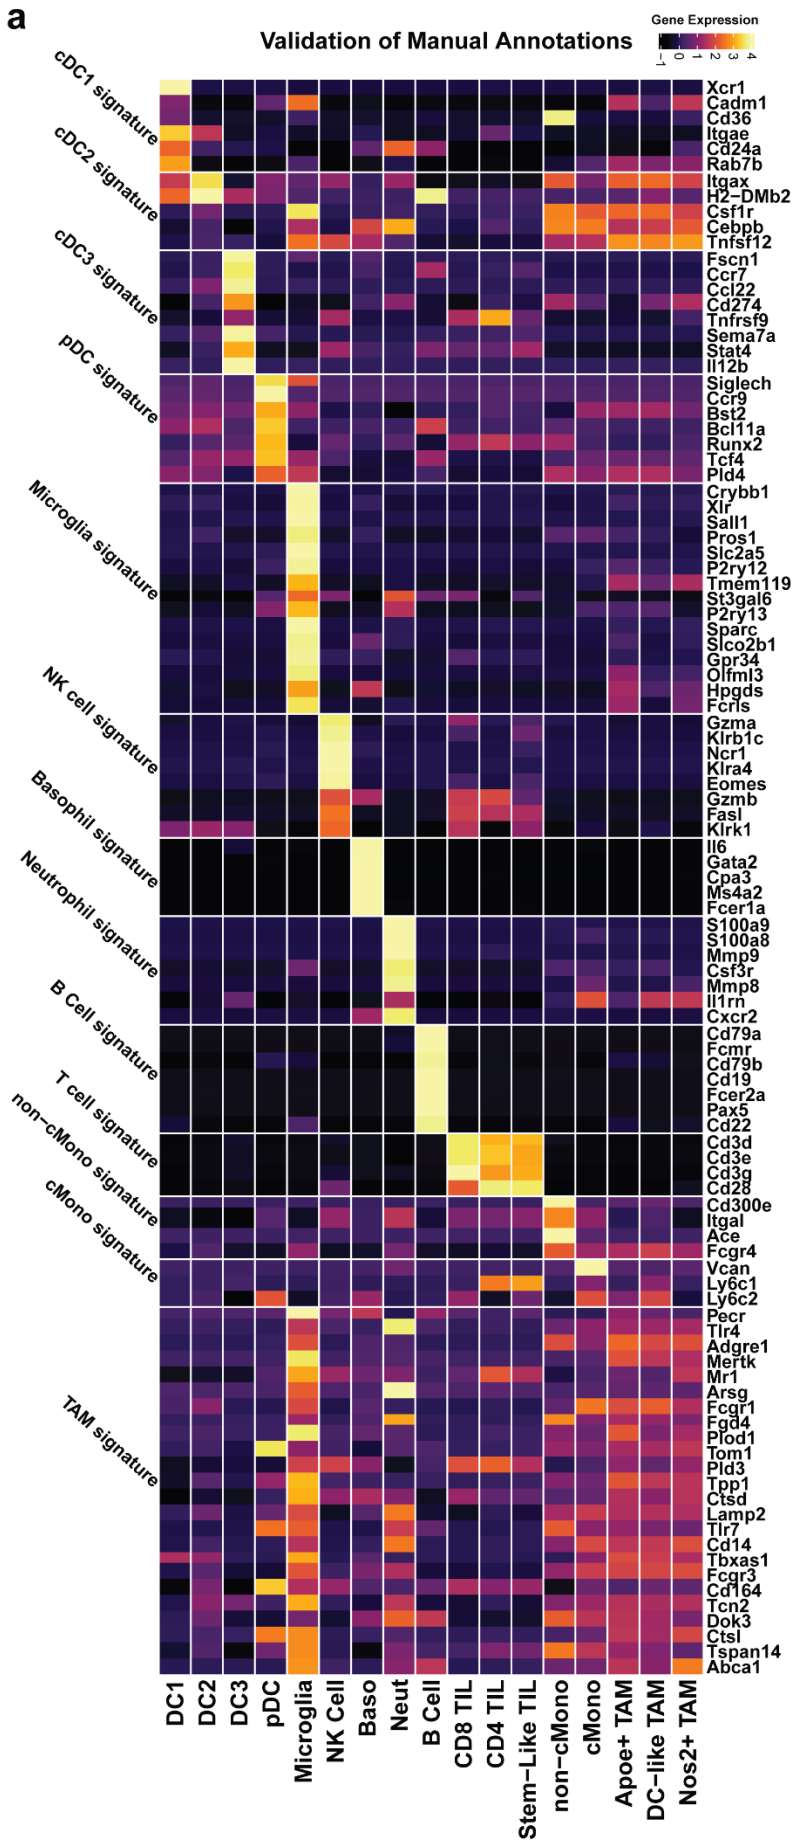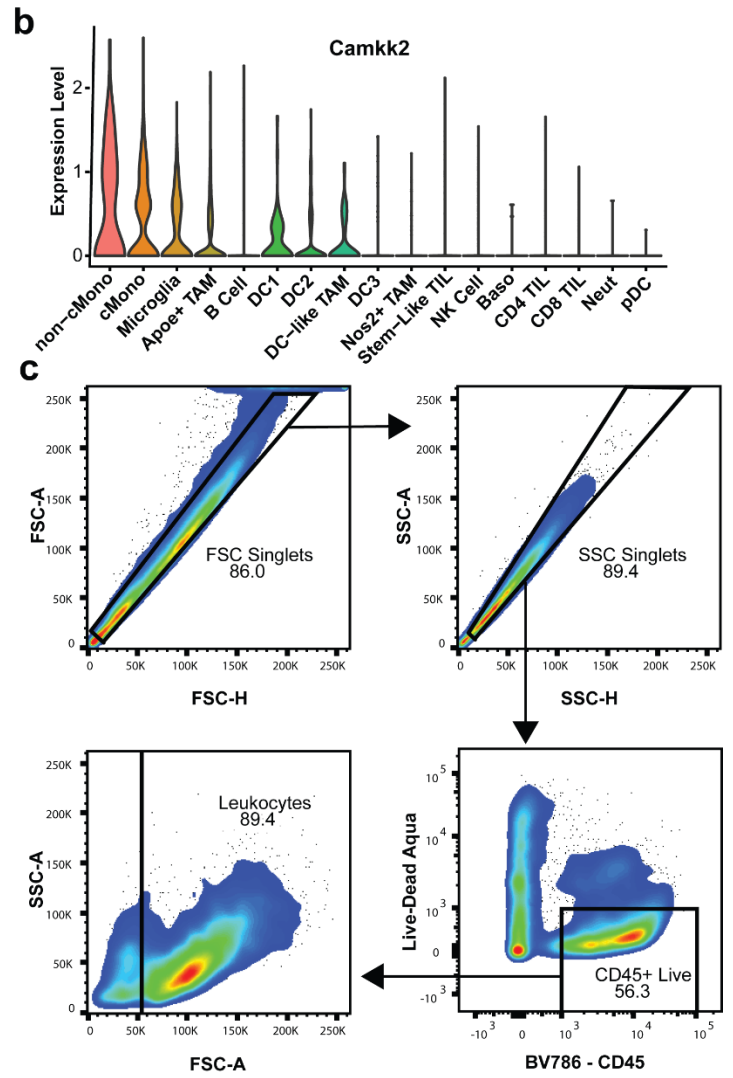

Supplementary Figure 2. **scRNA-seq clusters highly express previously identified cell signatures.** **a** Scaled expression of immune signature genes in the cell clusters identified in the scRNA-seq dataset. **b** Violin plots of CaMKK2 expression levels across immune subsets of WT cells. **c** Cell sorting strategy used for scRNA-seq experiment.

Supplementary Figure 3

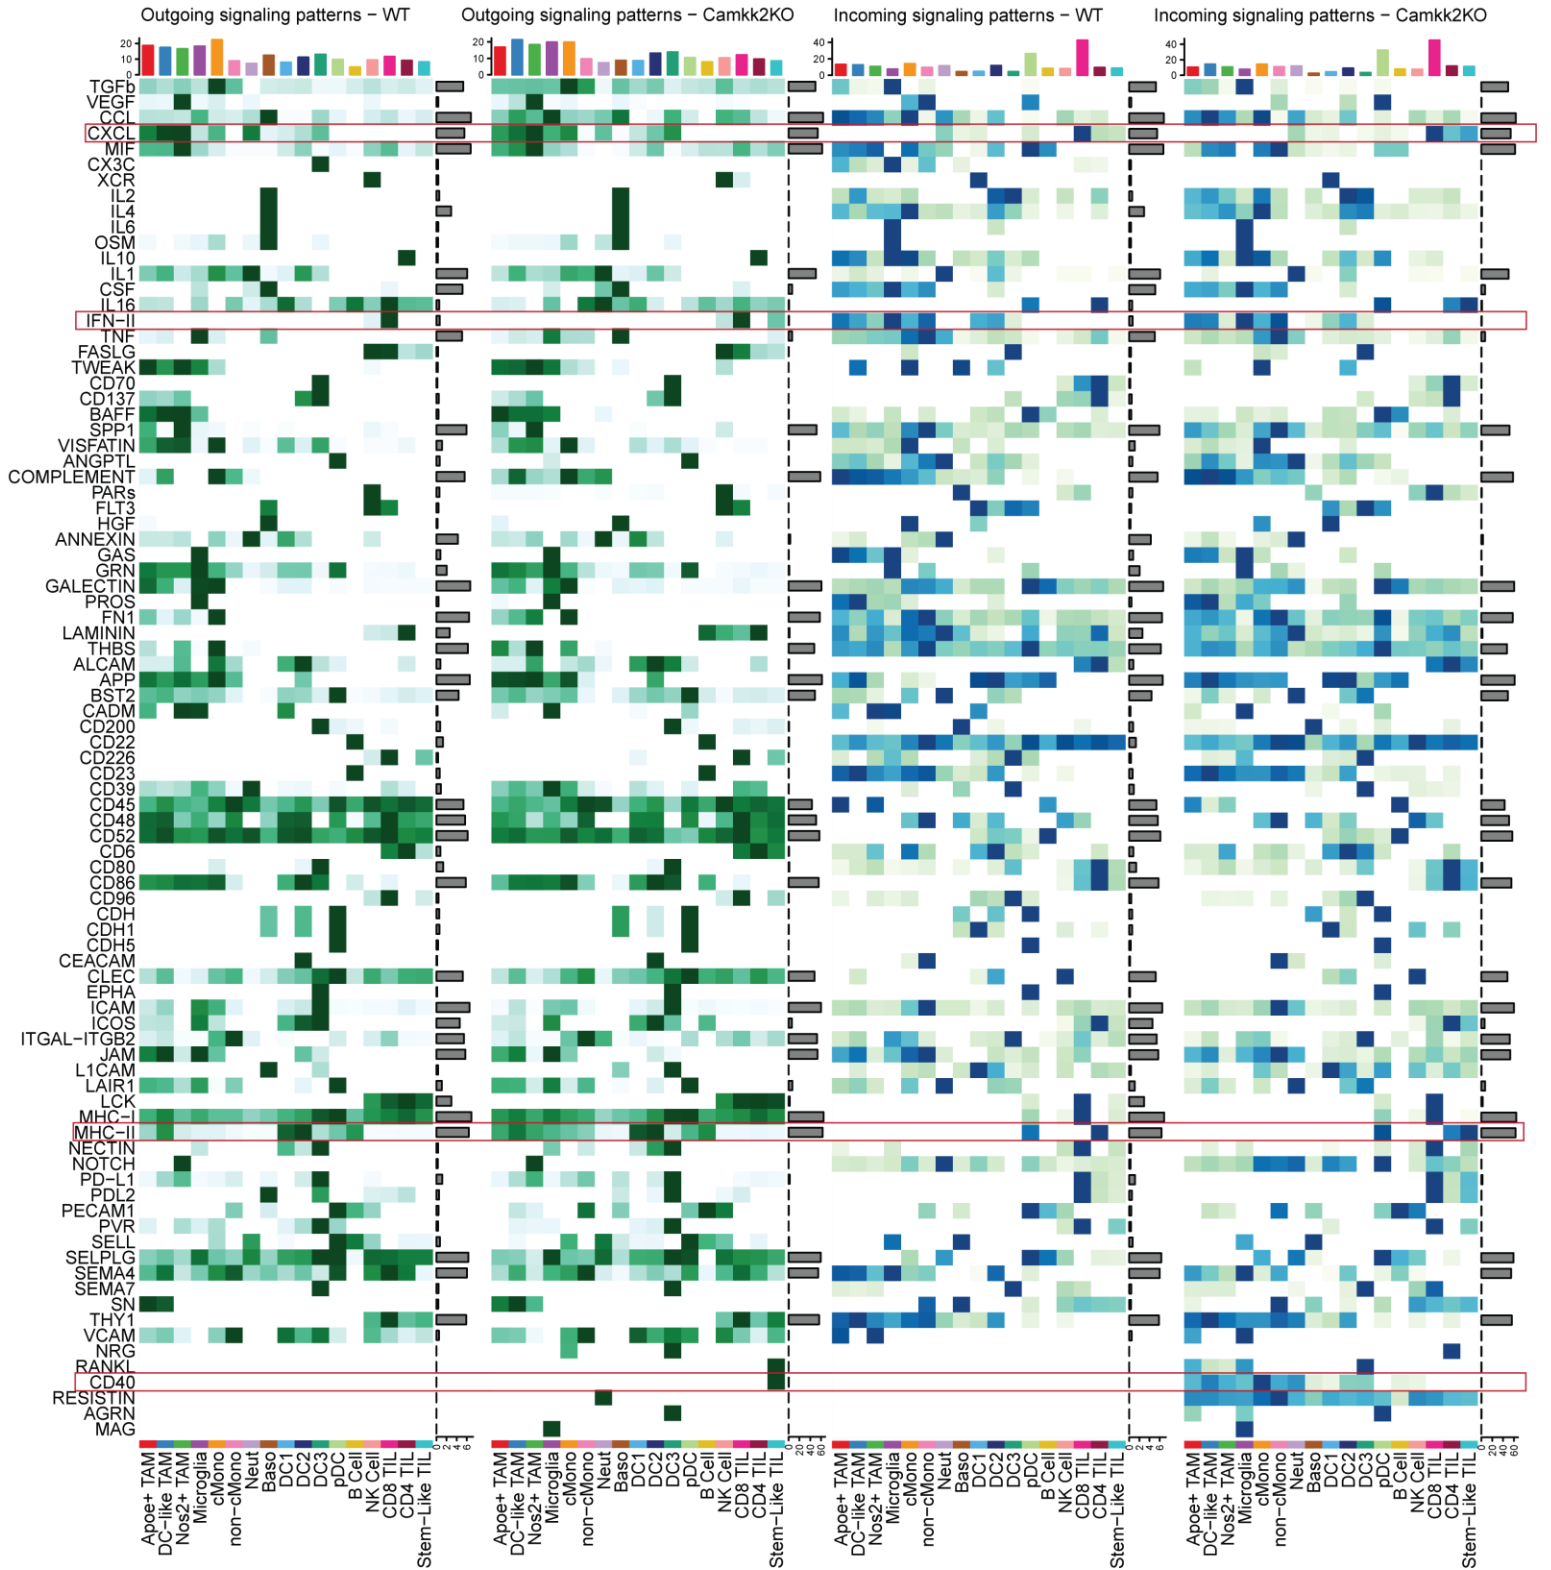

Supplementary Figure 3. **CXCL, IFN-II, MHC-II, and CD40 interaction pathways are enriched in myeloid cells of the CaMKK2 deficient tumor immune microenvironment.** Relative overall interaction strength for the observed receptor-ligand interaction pathways is indicated in this heatmap for the cell clusters identified in the scRNA-seq data. Bar plots on the perimeter of the heatmaps represent the sum of signaling strengths for that pathway across cell types (right side) or the sum of all pathway interaction strengths for a given cell type (on the top). Outgoing signaling patterns refer to cells which express the ligand for that pathway and are considered the “sender”. Incoming signaling patterns refer to cells which express the receptor for that pathway and are considered the “targets”.

**Supplementary Figure 4**

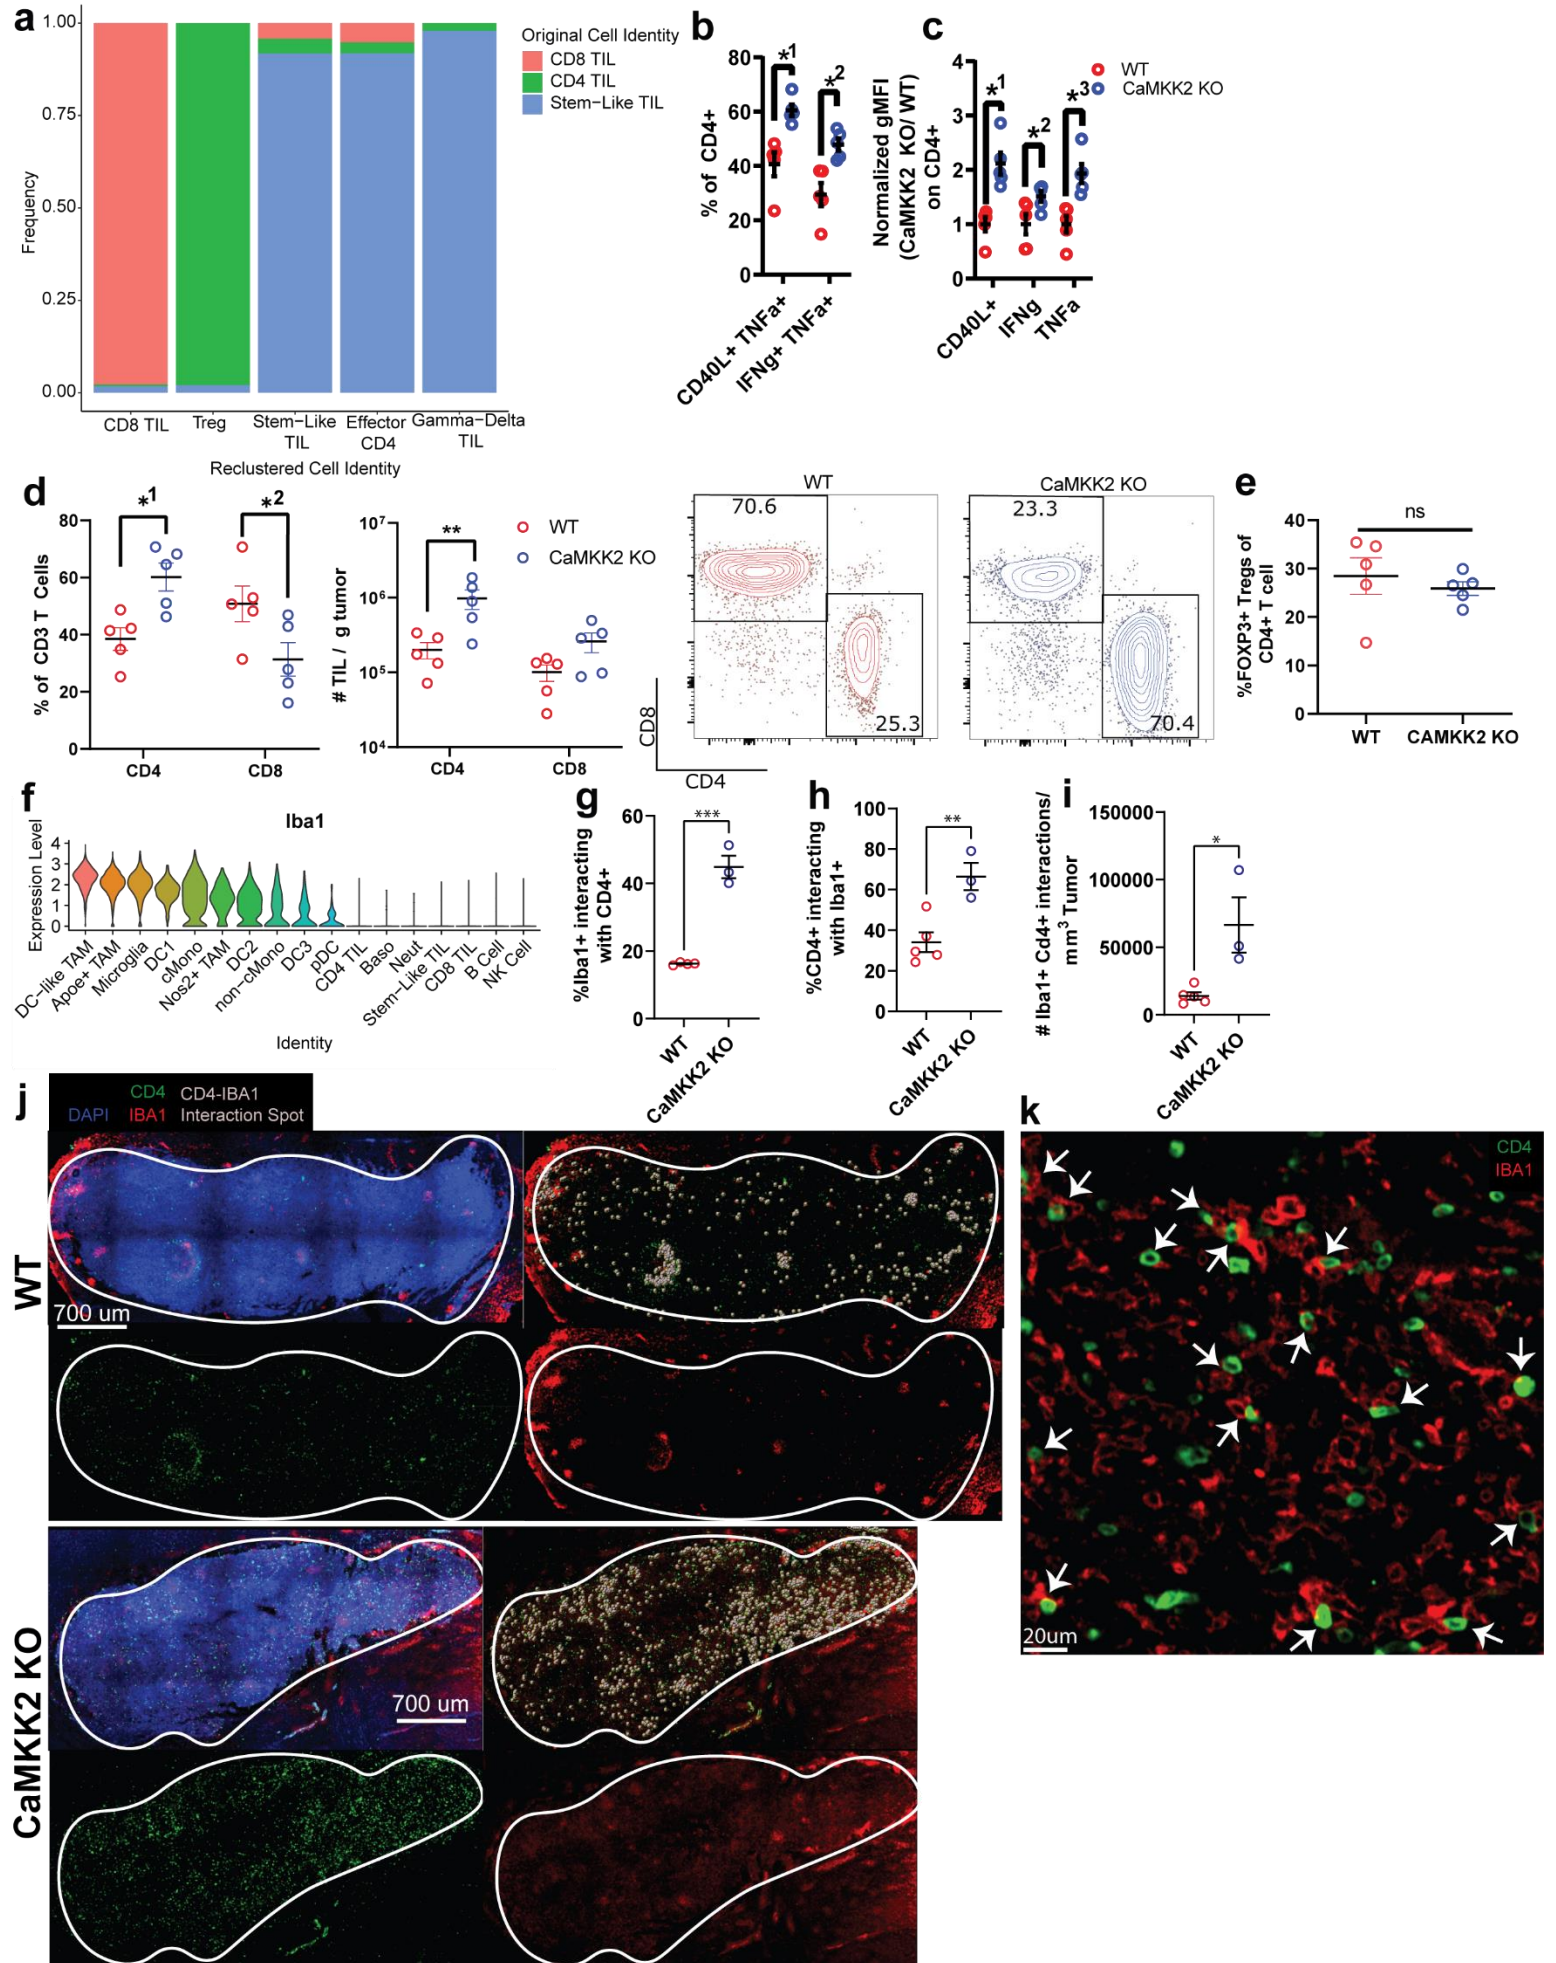

Supplementary Figure 4. **CaMKK2 reduces CD4-myeloid interactions in the glioma tumor microenvironment.** **a** Stacked bar plot showing the frequency of the originally identified TIL clusters (Fig. 2b) in the new clusters identified through reclustering (Fig.3a). **b-e** Tumor bearing-hemispheres were harvested on D14 post CT2a implantation and assessed by flow cytometry. **b,c** n = 5 per genotype, two-tailed Holm-Sidak adjusted t-test. **b** \*<sup>1</sup> = adj. p = .007, \*<sup>2</sup> = adj. p = .007. **c** Each sample replicate was normalized to the average WT gMFI, \*<sup>1</sup> = adj. p = .005, \*<sup>2</sup> = adj. p = .045, \*<sup>3</sup> = adj. p = .008. **d** n = 5 per genotype, two-way RM ANOVA p < .05 with post-hoc unadjusted two-tail Fisher LSD t-test, \*<sup>1</sup> = p = .011, \*<sup>2</sup> = p = .020, \*\* = p = .002. **e** n = 5 per genotype, two-tailed t-test. **f** Iba1 expression levels in cell types identified in scRNA-seq. **g** Percentage of Iba1+ cells which co-localize with CD4+ cells found by microscopy images of D14 tumor-bearing hemispheres. n = 5 WT, n = 3 CaMKK2 KO, two-tailed t-test, \*\*\* = p = .0002. **h** Percentage of CD4+ cells which co-localize with Iba1+ myeloid cells found by microscopy images of D14 tumor-bearing hemispheres. n = 5 WT, n = 3 CaMKK2 KO, two-tailed t-test, \*\* = p = .0073. **i** Number of Iba1+ myeloid cells which co-localize with CD4+ cells found per mm<sup>3</sup> tumor by microscopy images of D14 tumor-bearing hemispheres. n = 5 WT, n = 3 CaMKK2 KO, two-tailed t-test, \* = p = .0143. **j** Representative images of D14 tumor-bearing hemispheres stained with CD4, Iba1, and DAPI to identify CD4+ cells, myeloid cells, and nuclei respectively. Spot surfaces were created around cells and interaction was defined as co-localization of Iba+ and CD4+ spots. **k** Representative image of a single z-plane within the tumor microenvironment showing CD4+ Iba1+ interactions. **b-e, g-i** Data are presented as mean ± S.E.M. **j-k** Experiments were independently repeated twice. Source data are provided as a Source Data file.

Supplementary Figure 5

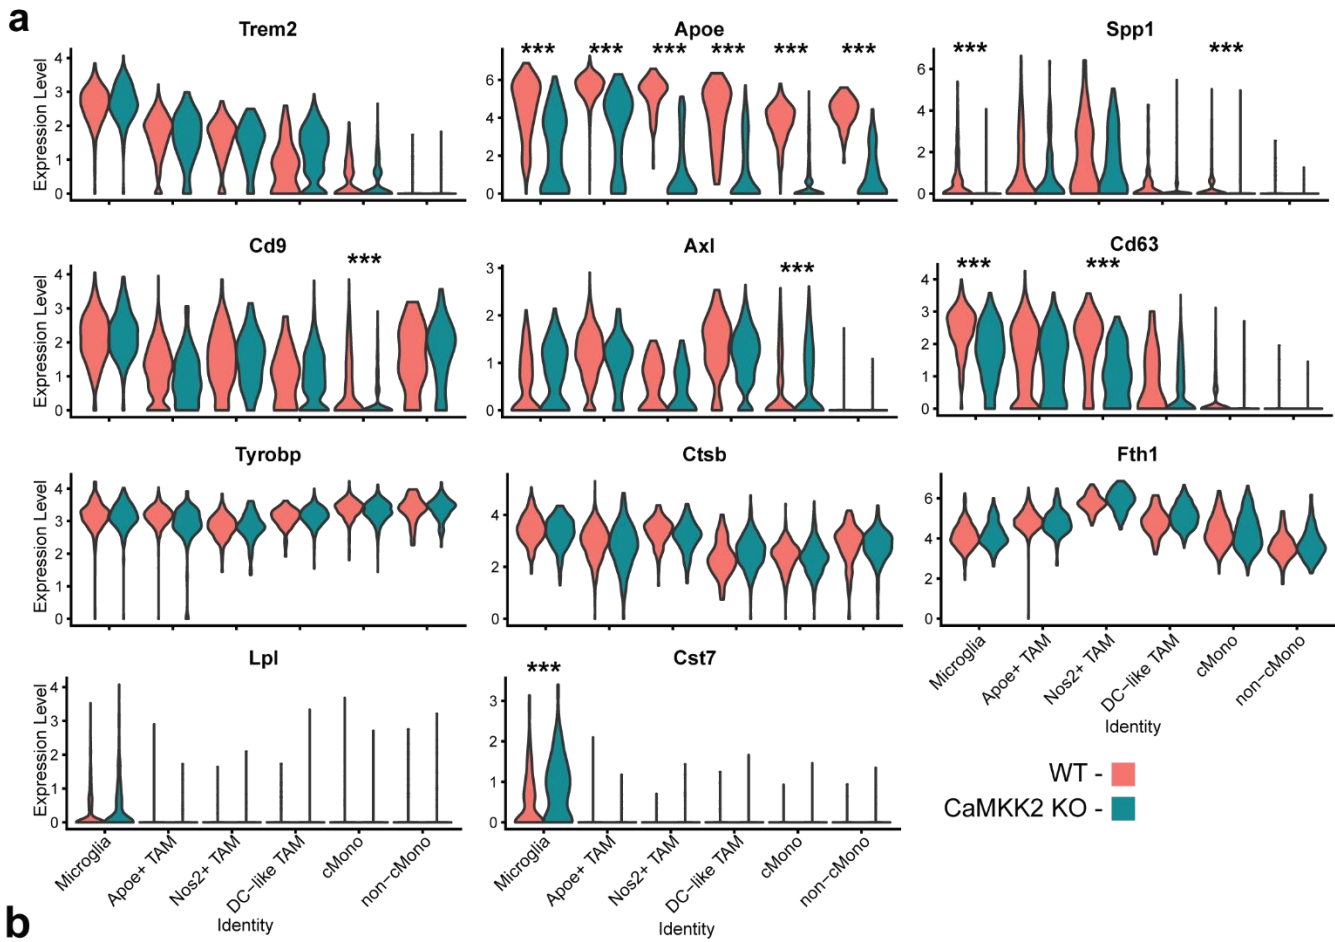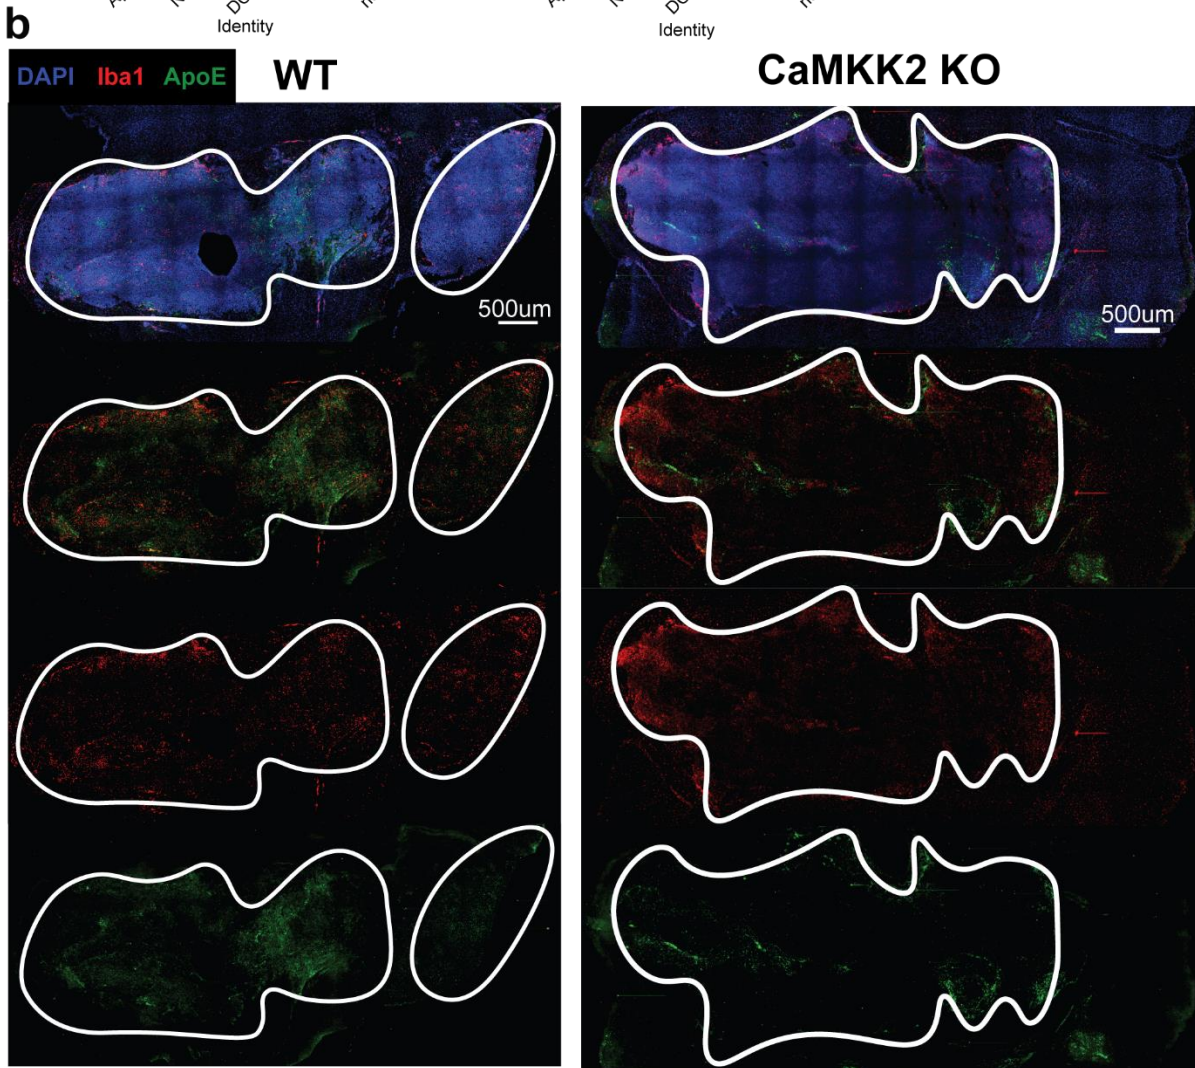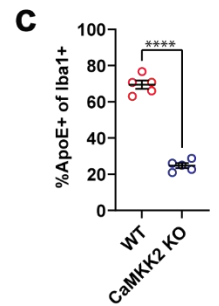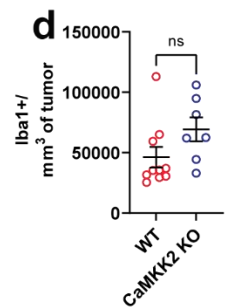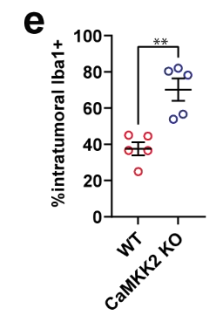



Supplementary Figure 5. **CaMKK2 promotes Apoe<sup>+</sup> phenotype and restricts intratumoral infiltration of myeloid cells.** **a** Violin plots of DAM signature genes stratified by genotype and cell type. MAST was used for differential expression testing. \*\*\* = adj. p < .005. **b** Representative images of D14 tumor-bearing hemispheres stained with Iba1 to identify myeloid cells, and Apoe to identify Apoe<sup>+</sup> TAMs. Spot surfaces were created around Iba<sup>+</sup> cells and %ApoE<sup>+</sup> refers to Apoe signal co-localizing with Iba1<sup>+</sup> spots. Experiment was independently repeated twice. **c** Percent of Iba1<sup>+</sup> cells which colocalized with Apoe signal in confocal microscopy images of D14 tumor-bearing hemispheres. n = 5 per genotype, two-tailed t-test. \*\*\*\* = p < .0001 **d** Number of Iba1<sup>+</sup> cells found per mm<sup>3</sup> tumor by confocal microscopy images of D14 tumor-bearing hemispheres. n = 10 WT, n = 7 CaMKK2 KO, two-tailed t-test. Results are combined from two independent experiments **e** Percentage of intratumoral Iba1<sup>+</sup> cells of total Iba1<sup>+</sup> cells identified, in D14 tumor-bearing hemispheres, by confocal microscopy. n = 5 per genotype, two-tailed t-test. \*\* = p = .0018 **c-e** Data are presented as mean ± S.E.M. Source data are provided as a Source Data file.

Supplementary Figure 6

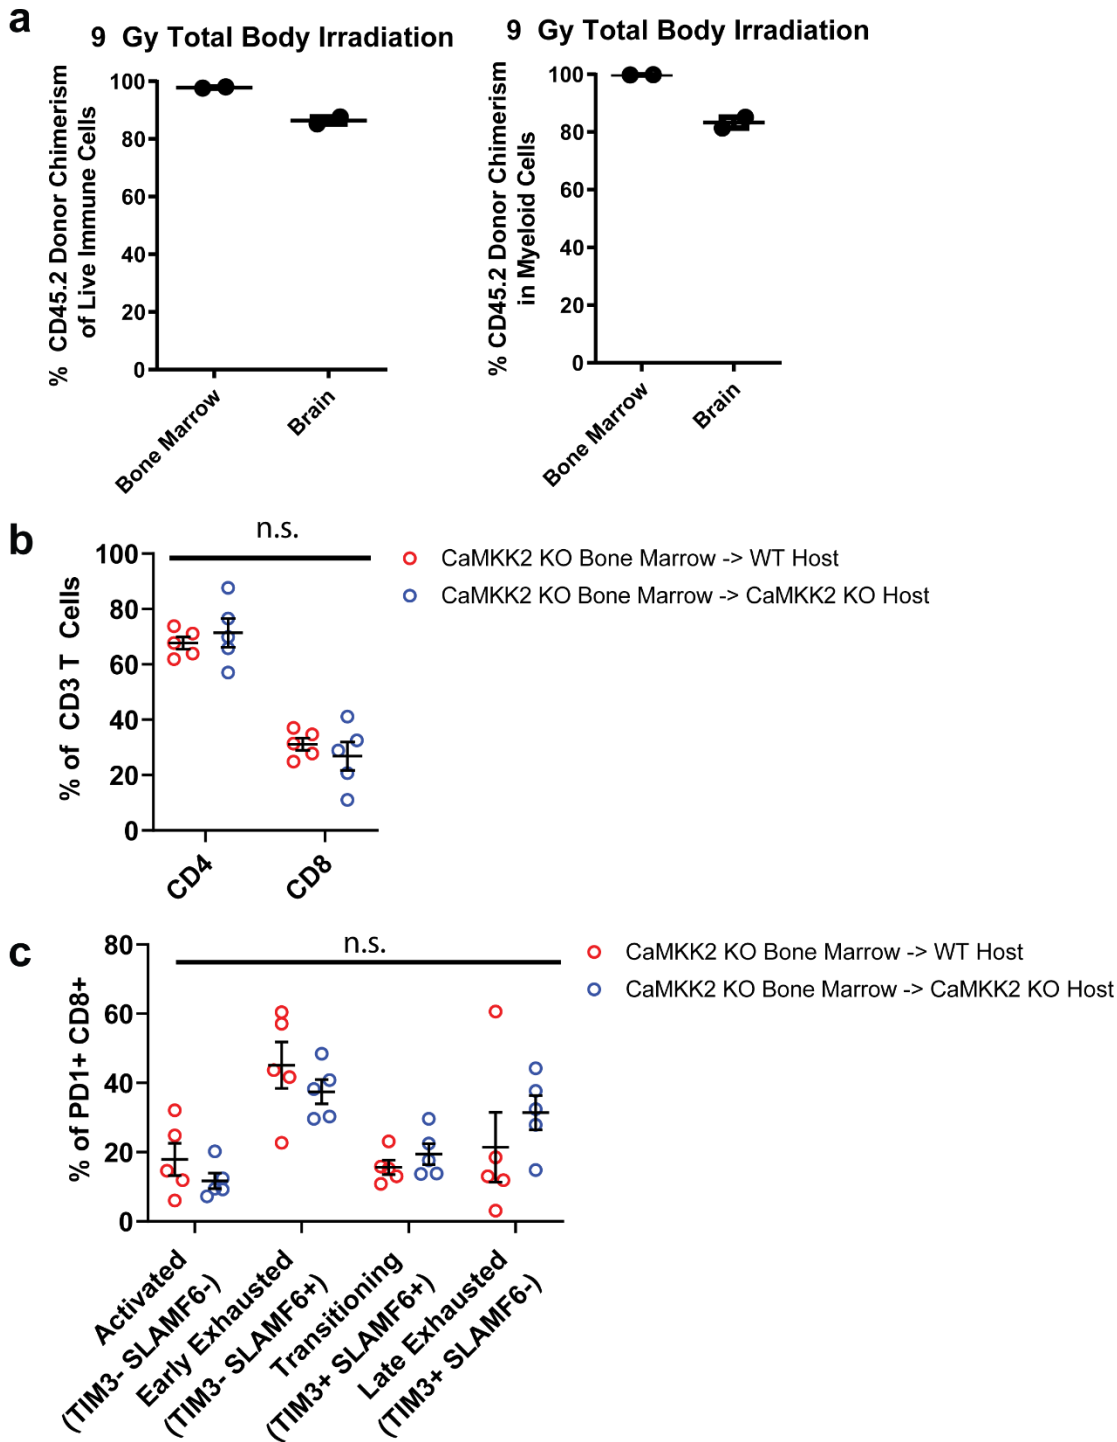

Supplementary Figure 6. **Hematopoietic CaMKK2 deficiency is sufficient to phenocopy total body CaMKK2 deficiency T cell phenotypes.** **a** CD45.1 Naïve mice were irradiated with 9 Gy irradiation and then received CD45.2 bone marrow. After recovering for 8 weeks donor chimerism was assessed in the bone marrow and brain.  $n = 2$  mice. **b,c** Either WT or CaMKK2 KO mice received bone marrow from CaMKK2 KO mice after receiving 9Gy radiation. Recipient mice recovered for 8 weeks prior to tumor implantation of CT2a. Tumor-bearing hemispheres were harvested on D14 post tumor implantation and stained with a multi-color flow panel to assess TIL abundance and exhaustion.  $n = 5$  per group, two-way RM ANOVA  $p > .05$ . **a-c** Data are presented as mean  $\pm$  S.E.M. Source data are provided as a Source Data file.

**Supplementary Table 1**

| Antigen      | Company        | Clone        | Fluorophore          | Catalog Number | Dilution | Panel                                                               |
|--------------|----------------|--------------|----------------------|----------------|----------|---------------------------------------------------------------------|
| Trem2        | R&D Systems    | 237920       | PE                   | FAB17291 P     | 1:50     | TAMs                                                                |
| Tim3         | invitrogen     | RMT3-23      | PE                   | 12-5870-82     | 1:200    | Exhaustion                                                          |
| CD154/CD40 L | BioLegend      | MR1          | PE                   | 106506         | 1:200    | Effector CD4                                                        |
| Ly-6C        | BioLegend      | HK1.4        | PE/Dazzle            | 128043         | 1:200    | Broad Immunophenotyping                                             |
| IFN-gamma    | BioLegend      | XMG1.2       | PE/Dazzle            | 505846         | 1:200    | Effector CD4                                                        |
| CD44         | BioLegend      | IM7          | PE-Cyanine7          | 103029         | 1:400    | Effector to Treg                                                    |
| Cd40         | Invitrogen     | 1C10         | APC                  | 17-0401-82     | 1:100    | TAMs                                                                |
| Foxp3        | invitrogen     | FJK-16s      | APC                  | 17-5773-80     | 1:100    | Effector to Treg, Effector CD4                                      |
| TOX          | invitrogen     | TXRX10       | eF660                | 50-6502-82     | 1:200    | Effector CD4                                                        |
| SLAMF6       | invitrogen     | eBio13G3-19D | APC                  | 17-1508-82     | 1:200    | Exhaustion                                                          |
| CD4          | BioLegend      | RM4-5        | AF700                | 100536         | 1:200    | Effector CD4, Exhaustion                                            |
| CD8a         | BioLegend      | 53-6.7       | APC/Cy7              | 100714         | 1:100    | Effector to Treg, Exhaustion                                        |
| CD8a         | Biolegend      | 53-6.7       | Brilliant Violet 421 | 100753         | 1:200    | Effector CD4                                                        |
| CD3          | BD Biosciences | 17A2         | Brilliant Violet 421 | 564008         | 1:200    | Exhaustion                                                          |
| CD62L        | BioLegend      | MEL-14       | Brilliant Violet 421 | 104435         | 1:100    | Effector to Treg                                                    |
| CD45         | invitrogen     | 30-F11       | evolve 605           | 83-0451-42     | 1:100    | Effector to Treg, Effector CD4, Exhaustion                          |
| MRC1/CD206   | Biolegend      | C068C2       | Brilliant Violet 605 | 141721         | 1:100    | TAMs                                                                |
| CD3e         | BD Biosciences | 145-2C11     | Brilliant Violet 650 | 564378         | 1:100    | Effector to Treg                                                    |
| CD4          | BD Biosciences | GK1.5        | Brilliant Violet 786 | 563331         | 1:100    | Effector to Treg                                                    |
| TNF-alpha    | BioLegend      | MP6-XT22     | Brilliant Violet 785 | 506341         | 1:200    | Effector CD4                                                        |
| CD 279/PD-1  | BD Biosciences | J43          | Brilliant Violet 786 | 744548         | 1:200    | Exhaustion                                                          |
| CD11c        | BioLegend      | N418         | Brilliant Violet 421 | 117343         | 1:200    | Broad Immunophenotyping                                             |
| Zombie Aqua  | BioLegend      | N/A          | Brilliant Violet 510 | 423102         | 1:400    | Broad Immunophenotyping, Effector to Treg, Effector CD4, Exhaustion |
| CD4          | eBioscience    | RM4-5        | Brilliant Violet 605 | 83-0042-42     | 1:400    | Broad Immunophenotyping                                             |
| MHC II       | eBioscience    | M5/114.15.2  | Brilliant Violet 650 | 64-5321-82     | 1:400    | Broad Immunophenotyping                                             |
| F4/80        | BioLegend      | BM8          | Brilliant Violet 711 | 123417         | 1:200    | Broad Immunophenotyping                                             |

|        |                |          |                      |            |       |                         |
|--------|----------------|----------|----------------------|------------|-------|-------------------------|
| CD45.2 | BD Biosciences | 104      | Brilliant Violet 786 | 563686     | 1:100 | Broad Immunophenotyping |
| Ly6G   | BD Biosciences | 1A8      | PerCP-Cy5.5          | 566435     | 1:100 | Broad Immunophenotyping |
| CD3    | eBioscience    | 143-2C11 | PE                   | 12-0031-82 | 1:100 | Broad Immunophenotyping |
| NK1.1  | BioLegend      | PK136    | PE-Cy5               | 108702     | 1:100 | Broad Immunophenotyping |
| CD43   | BD Biosciences | S7       | PE-Cy7               | 562866     | 1:100 | Broad Immunophenotyping |
| B220   | BioLegend      | RA3-6B2  | APC                  | 103212     | 1:200 | Broad Immunophenotyping |
| CD8    | eBioscience    | 53-6.7   | AF700                | 56-0081-82 | 1:200 | Broad Immunophenotyping |
| CD11b  | BD Biosciences | M1/70    | APC-Cy7              | 557657     | 1:400 | Broad Immunophenotyping |

Supplementary Table 1. **Flow cytometry antibodies list.** This table provides the details for the flow cytometry antibodies used within this manuscript.

### Supplementary Table 2

| Antigen    | Company                | Clone      | Host    | Target  | Fluorophore | Catalog Number | Dilution |
|------------|------------------------|------------|---------|---------|-------------|----------------|----------|
| CD4        | abcam                  | EPR19514   | Rabbit  | Mouse   | N/A         | ab183685       | 1 to 500 |
| Rabbit Fc  | invitrogen             | Polyclonal | Donkey  | Rabbit  | AF647       | A31573         | 1 to 500 |
| GFP        | ThermoFisher           | Polyclonal | Chicken | Mouse   | N/A         | A10262         | 1 to 500 |
| Chicken Fc | Jackson ImmunoResearch | Polyclonal | Donkey  | Chicken | AF488       | AB_2340375     | 1 to 500 |
| NeuN       | abcam                  | EPR12763   | Rabbit  | Mouse   | N/A         | ab177487       | 1 to 500 |
| Goat Fc    | invitrogen             | Polyclonal | Donkey  | Goat    | AF568       | A11057         | 1 to 500 |
| Iba1       | abcam                  | EPR16588   | Rabbit  | Mouse   | N/A         | ab178846       | 1 to 500 |
| ApoE       | abcam                  | EPR19392   | Rabbit  | Mouse   | N/A         | ab183597       | 1 to 200 |
| Iba1       | abcam                  | Polyclonal | Goat    | Mouse   | N/A         | ab5076         | 1 to 500 |

Supplementary Table 2. **Immunofluorescence antibodies list.** This table provides the details of the immunofluorescence antibodies used within this manuscript.
